# Supplementary material for: Towards enhanced sodium storage by investigation of the Li ion doping and rearrangement mechanism in Na3V2(PO4)3 for sodium ion batteries
Source: Royal Society of Chemistry journal article supplement (doi:10.1039/c8ta00117k), 2018-01-01
Supplement: c8ta00117k1.pdf [file c8ta00117k1.pdf]

## Supporting Information

### Towards Enhanced Sodium Storage by Investigation on Li Ions Doping and Rearrangement Mechanism in $\text{Na}_3\text{V}_2(\text{PO}_4)_3$ for Sodium Ion Batteries

Qiong Zheng, Xiao Ni, Le Lin, Hongming Yi, Xiuwen Han, Xianfeng Li, Xinhe Bao\*, and Huamin Zhang\*

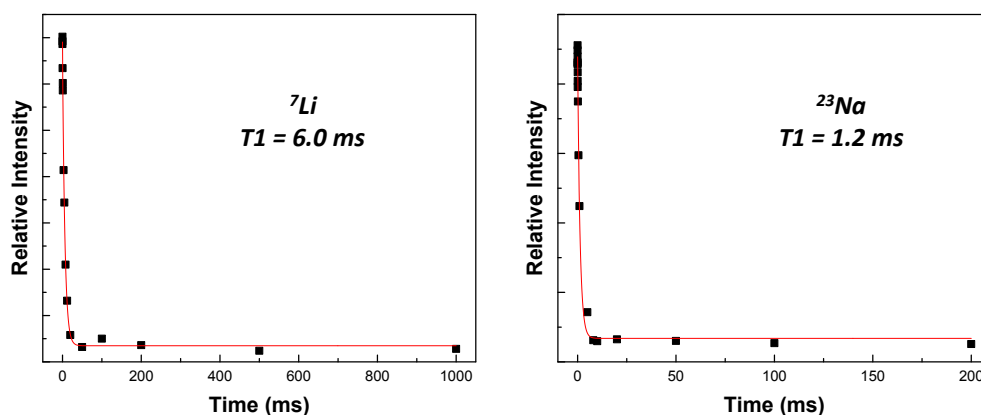

**Figure S1.** Plot of the longitudinal relaxation time ( $T_1$ ) measurements for  $^7\text{Li}$  in  $\text{Li}_3\text{V}_2(\text{PO}_4)_3$  and  $^{23}\text{Na}$  in  $\text{Na}_3\text{V}_2(\text{PO}_4)_3$ .

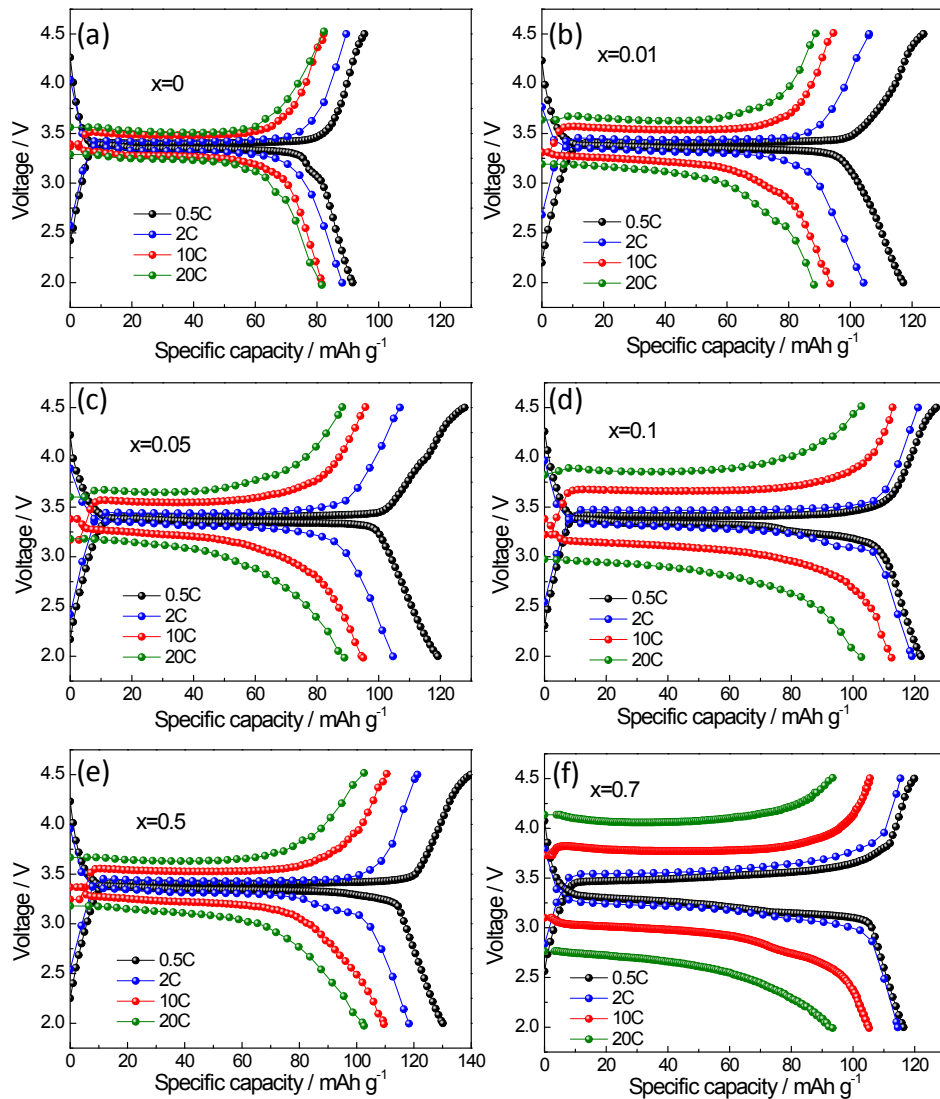

**Figure S2.** Charge-discharge profiles at different rates (0.5C, 2C, 10C and 20C) for the Na<sub>3-x</sub>Li<sub>x</sub>V<sub>2</sub>(PO<sub>4</sub>)<sub>3</sub>/C samples (a) x = 0, (b) x = 0.01, (c) x = 0.05, (d) x = 0.1, (e) x = 0.5 and (f) x = 0.7.

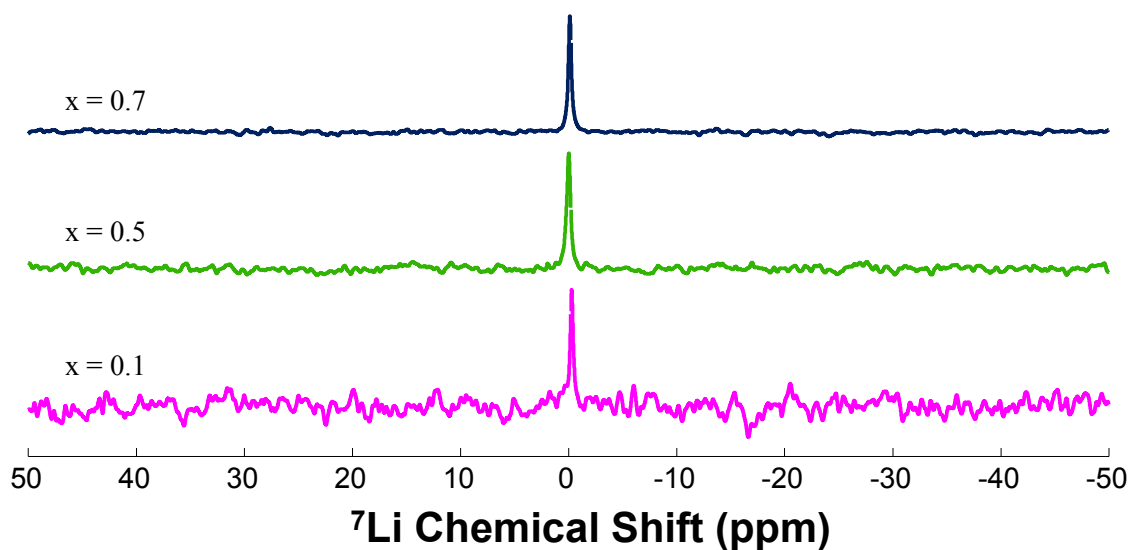

**Figure S3.**  $^7\text{Li}$  liquid NMR spectra of the electrolyte solvent after immersing  $\text{Na}_{3-x}\text{Li}_x\text{V}_2(\text{PO}_4)_3$  cathode materials.

**Table S1.** Theoretical weight ratio and ICP results for the elements in the  $\text{Na}_{3-x}\text{Li}_x\text{V}_2(\text{PO}_4)_3/\text{C}$  ( $x = 0, 0.01, 0.05, 0.1, 0.5$  and  $0.7$ ) samples.

| Samples    | Na           | Li            | P             | V             | C       |
|------------|--------------|---------------|---------------|---------------|---------|
|            | Thr./Exp.(%) | Thr./ Exp.(%) | Thr./ Exp.(%) | Thr./ Exp.(%) | Exp.(%) |
| $x = 0$    | 13.80/13.80  | 0.00/0.00     | 18.60/18.11   | 20.35/19.09   | 8.84    |
| $x = 0.01$ | 13.70/13.65  | 0.01/0.01     | 18.53/17.64   | 20.28/18.41   | 9.22    |
| $x = 0.05$ | 13.62/13.60  | 0.07/0.05     | 18.67/17.78   | 20.42/19.73   | 8.69    |
| $x = 0.1$  | 13.45/13.13  | 0.14/0.09     | 18.75/17.43   | 20.51/18.96   | 8.45    |
| $x = 0.5$  | 11.65/11.51  | 0.71/0.68     | 18.84/18.10   | 20.61/19.74   | 9.31    |
| $x = 0.7$  | 10.85/10.94  | 1.00/0.93     | 19.07/18.20   | 20.87/19.14   | 8.82    |

**Table S2.** Relative integral of Na2 and Na1 sites in the  $^{23}\text{Na}$  ssNMR spectra of  $\text{Na}_{3-x}\text{Li}_x\text{V}_2(\text{PO}_4)_3$  samples.

|                  | Relative Intensity |            |            |           |           |           |
|------------------|--------------------|------------|------------|-----------|-----------|-----------|
|                  | $x = 0$            | $x = 0.01$ | $x = 0.05$ | $x = 0.1$ | $x = 0.5$ | $x = 0.7$ |
| Na2(M2)          | 0.66               | 0.65       | 0.63       | 0.53      | 0.58      | 0.71      |
| Na1(M1)          | 0.34               | 0.35       | 0.37       | 0.47      | 0.42      | 0.29      |
| Ratio (Na2: Na1) | 1.94               | 1.86       | 1.70       | 1.13      | 1.38      | 2.45      |

**Table S3.** Ions occupancy in the  $\text{Na}_3\text{V}_2(\text{PO}_4)_3$ ,  $\text{Na}_{2.9}\text{Li}_{0.1}\text{V}_2(\text{PO}_4)_3$ ,  $\text{Na}_{2.5}\text{Li}_{0.5}\text{V}_2(\text{PO}_4)_3$  and  $\text{Na}_{2.3}\text{Li}_{0.7}\text{V}_2(\text{PO}_4)_3$  samples.

| Samples   | Na1    | Na2    | V | P | O1 | O2 | Ratio (Na2/Na1) |
|-----------|--------|--------|---|---|----|----|-----------------|
| $x = 0$   | 0.7894 | 0.7466 | 1 | 1 | 1  | 1  | 1.8916          |
| $x = 0.1$ | 0.7959 | 0.7401 | 1 | 1 | 1  | 1  | 1.8598          |
| $x = 0.5$ | 0.7408 | 0.7952 | 1 | 1 | 1  | 1  | 2.1469          |
| $x = 0.7$ | 0.6969 | 0.8391 | 1 | 1 | 1  | 1  | 2.4081          |
